# Supplementary material
Source: PubMed Central journal article supplement (PMC4839398)
Supplement: pnas.201519862SI.pdf [file pnas.201519862SI.pdf]

# Supporting Information

Hartman et al. 10.1073/pnas.1519862113

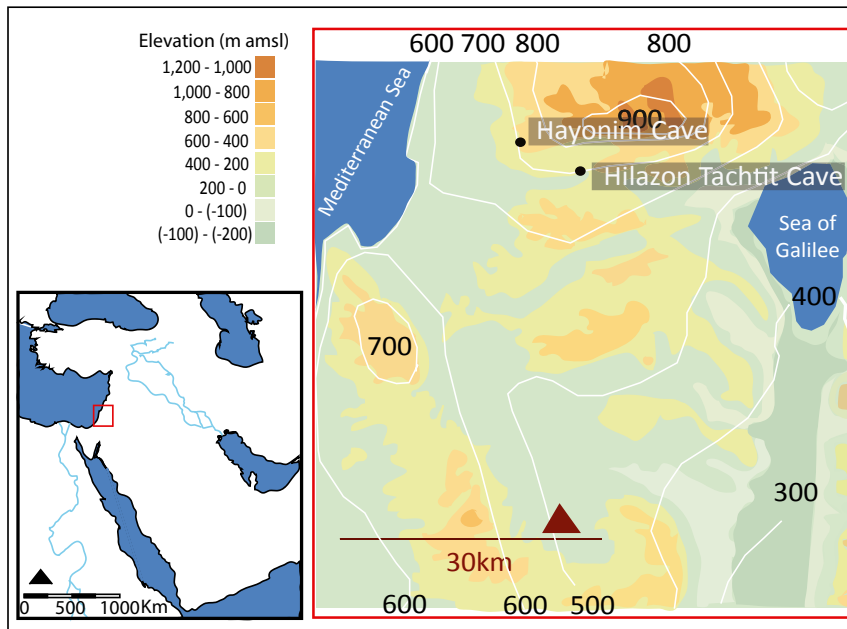

Fig. 51. Regional and local maps of Hayonim and Hilazon Tachtit Caves. White contour lines and black numerals represent modern isohyets (1961–1990).

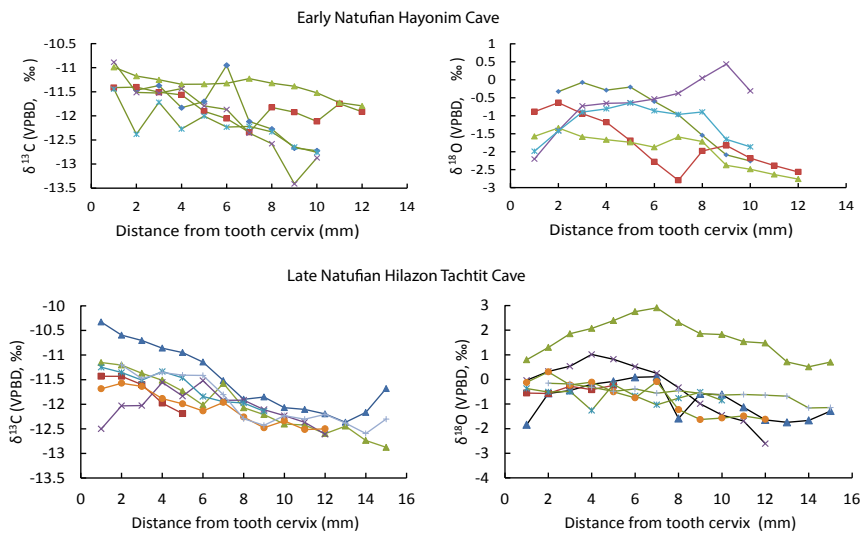

Fig. 52. Sequential sampling results of individual M<sub>3</sub> teeth from Early Natufian Hayonim Cave and Late Natufian Hilazon Tachtit Cave that were not corrected for minor differences in fawn birth timing.



**Table S1. Gazelle tooth enamel carbonate isotope data**

| Sample | Phase  | n  | $\delta^{13}\text{C}$ (‰) |                                    |                                    |                       | $\delta^{18}\text{O}$ (‰) |                                    |                                    |                       |
|--------|--------|----|---------------------------|------------------------------------|------------------------------------|-----------------------|---------------------------|------------------------------------|------------------------------------|-----------------------|
|        |        |    | $\bar{x}$                 | $\delta^{13}\text{C}_{\text{min}}$ | $\delta^{13}\text{C}_{\text{max}}$ | $\Delta^{13}\text{C}$ | $\bar{x}$                 | $\delta^{18}\text{O}_{\text{min}}$ | $\delta^{18}\text{O}_{\text{max}}$ | $\Delta^{18}\text{O}$ |
| 1      | EN HC  | 12 | -12.46                    | -12.94                             | -12.05                             | 0.90                  | -5.38                     | -6.47                              | -3.88                              | 2.59                  |
| 2      | EN HC  | 14 | -12.19                    | -12.64                             | -11.67                             | 0.97                  | -5.36                     | -5.74                              | -4.81                              | 0.94                  |
| 3      | EN HC  | 12 | -10.75                    | -11.36                             | -10.30                             | 1.07                  | -3.09                     | -4.05                              | -2.35                              | 1.69                  |
| 4      | EN HC  | 8  | -11.13                    | -11.72                             | -10.93                             | 0.79                  | -3.91                     | -5.11                              | -1.36                              | 3.74                  |
| 6      | EN HC  | 8  | -11.15                    | -11.33                             | -10.84                             | 0.50                  | -0.52                     | -0.86                              | 0.07                               | 0.94                  |
| 8      | EN HC  | 8  | -12.41                    | -12.45                             | -12.29                             | 0.16                  | -2.34                     | -2.92                              | -1.23                              | 1.69                  |
| 9      | EN HC  | 4  | -10.89                    | -11.29                             | -10.32                             | 0.97                  | -2.21                     | -3.42                              | -0.97                              | 2.45                  |
| 11     | EN HC  | 5  | -12.00                    | -12.41                             | -11.60                             | 0.81                  | -2.32                     | -2.98                              | -1.63                              | 1.35                  |
| 13     | EN HC  | 7  | -11.80                    | -12.65                             | -10.94                             | 1.72                  | -3.16                     | -3.95                              | -2.25                              | 1.71                  |
| 33     | EN HC  | 10 | -11.90                    | -12.72                             | -10.95                             | 1.77                  | -0.93                     | -2.26                              | -0.07                              | 2.19                  |
| 34     | EN HC  | 12 | -11.81                    | -12.34                             | -11.40                             | 0.94                  | -1.78                     | -2.80                              | -0.64                              | 2.16                  |
| 35     | EN HC  | 12 | -11.37                    | -11.79                             | -10.99                             | 0.80                  | -1.92                     | -2.76                              | -1.34                              | 1.42                  |
| 36     | EN HC  | 3  | -13.28                    | -13.51                             | -13.15                             | 0.35                  | -1.50                     | -1.53                              | -1.46                              | 0.07                  |
| 37     | EN HC  | 10 | -12.02                    | -13.41                             | -10.88                             | 2.52                  | -0.64                     | -2.20                              | 0.44                               | 2.64                  |
| 38     | EN HC  | 10 | -12.20                    | -12.76                             | -11.44                             | 1.32                  | -1.20                     | -1.99                              | -0.65                              | 1.34                  |
| 5      | LN HC  | 6  | -11.16                    | -11.60                             | -10.86                             | 0.73                  | -2.82                     | -3.22                              | -2.32                              | 0.90                  |
| 7      | LN HC  | 4  | -11.44                    | -11.64                             | -11.16                             | 0.48                  | -0.90                     | -1.88                              | -0.35                              | 1.54                  |
| 10     | LN HC  | 8  | -12.71                    | -13.50                             | -11.62                             | 1.88                  | -2.90                     | -4.39                              | -1.71                              | 2.68                  |
| 12     | LN HC  | 8  | -12.06                    | -12.82                             | -11.71                             | 1.11                  | -0.79                     | -2.27                              | 0.70                               | 2.97                  |
| 14     | LN HC  | 9  | -13.08                    | -13.46                             | -12.56                             | 0.89                  | -2.79                     | -3.77                              | -2.08                              | 1.69                  |
| 15     | LN HC  | 8  | -12.46                    | -13.45                             | -11.76                             | 1.69                  | -1.72                     | -3.03                              | -0.60                              | 2.43                  |
| 17     | LN HC  | 4  | -14.25                    | -14.84                             | -13.59                             | 1.25                  | -1.45                     | -2.34                              | -0.62                              | 1.72                  |
| 19     | LN HC  | 2  | -11.63                    |                                    |                                    |                       | 0.73                      |                                    |                                    |                       |
| 20     | LN HC  | 1  | -11.32                    |                                    |                                    |                       | 1.12                      |                                    |                                    |                       |
| 22     | LN HTC | 16 | -12.38                    | -13.25                             | -11.85                             | 1.39                  | -3.10                     | -4.58                              | -0.27                              | 4.31                  |
| 24     | LN HTC | 9  | -12.12                    | -12.83                             | -11.40                             | 1.43                  | -0.95                     | -2.22                              | 0.54                               | 2.91                  |
| 25     | LN HTC | 9  | -11.57                    | -12.03                             | -11.03                             | 0.99                  | -1.87                     | -2.39                              | -1.51                              | 0.88                  |
| 26     | LN HTC | 11 | -13.53                    | -14.27                             | -12.78                             | 1.49                  | -4.64                     | -5.61                              | -3.55                              | 2.06                  |
| 27     | LN HTC | 3  | -13.12                    | -13.47                             | -12.94                             | 0.53                  | -3.49                     | -4.18                              | -2.62                              | 1.56                  |
| 28     | LN HTC | 6  | -11.96                    | -12.74                             | -11.59                             | 1.15                  | -0.20                     | -1.24                              | 0.60                               | 1.84                  |
| 29     | LN HTC | 1  | -12.47                    |                                    |                                    |                       | 0.24                      |                                    |                                    |                       |
| 30     | LN HTC | 5  | -13.02                    | -13.59                             | -12.23                             | 1.36                  | -1.73                     | -3.10                              | -0.55                              | 2.56                  |
| 31     | LN HTC | 3  | -12.35                    | -12.85                             | -12.07                             | 0.78                  | -1.72                     | -2.38                              | -1.28                              | 1.10                  |
| 32     | LN HTC | 5  | -12.35                    | -12.75                             | -11.82                             | 0.93                  | 0.02                      | -0.60                              | 0.82                               | 1.42                  |
| 39     | LN HTC | 15 | -11.50                    | -12.37                             | -10.33                             | 2.04                  | -0.78                     | -1.85                              | 0.11                               | 1.95                  |
| 40     | LN HTC | 5  | -11.73                    | -12.19                             | -11.43                             | 0.76                  | -0.41                     | -0.57                              | -0.24                              | 0.33                  |
| 41     | LN HTC | 15 | -12.02                    | -12.88                             | -11.15                             | 1.72                  | 1.67                      | 0.51                               | 2.91                               | 2.40                  |
| 42     | LN HTC | 12 | -12.05                    | -12.61                             | -11.52                             | 1.09                  | -0.30                     | -2.61                              | 1.01                               | 3.62                  |
| 43     | LN HTC | 10 | -11.67                    | -12.14                             | -11.25                             | 0.89                  | -0.67                     | -1.26                              | -0.20                              | 1.06                  |
| 44     | LN HTC | 12 | -12.08                    | -12.51                             | -11.57                             | 0.94                  | -0.75                     | -1.63                              | 0.31                               | 1.93                  |
| 45     | LN HTC | 15 | -11.96                    | -12.60                             | -11.20                             | 1.40                  | -0.57                     | -1.16                              | -0.16                              | 1.00                  |
| 18     | HC     | 6  | -12.13                    | -12.60                             | -11.50                             | 1.10                  | -2.78                     | -3.32                              | -2.25                              | 1.07                  |
| 21     | HC     | 2  | -12.13                    |                                    |                                    |                       | -3.25                     |                                    |                                    |                       |

**Table S2. Provenience data for the gazelle molars available for this study**

| Number | Site | Year | Square | Subsquare | Depth below datum | Locus   | Fauna Cat. No. | Phase |
|--------|------|------|--------|-----------|-------------------|---------|----------------|-------|
| 1      | HC   | 1978 | L      | 30        | c                 | 245–250 | 15903          | EN    |
| 2      | HC   |      | H      | 25        | a+d               | 266–270 | 16066–16067    | EN    |
| 3      | HC   | 1978 | K      | 30        | a                 | 246–250 | 7 15908+15909  | EN    |
| 4      | HC   | 1969 | I      | 25        | c                 | 238–248 | 16095          | EN    |
| 5      | HC   | 1975 | K      | 26        | c                 | 184–189 | 15882          | LN    |
| 6      | HC   | 1978 | K      | 30        | a                 | 235–240 | 16098+16099    | EN    |
| 7      | HC   |      | J      | 26        |                   | 190–195 | 16068          | LN    |
| 8      | HC   | 1977 | M      | 28        | b                 | 204–210 | 15880          | EN    |
| 9      | HC   | 1978 | J      | 30        | b                 | 245–250 | 15901          | EN    |
| 10     | HC   | 1979 | O      | 24        | a                 | 180     | 15886          | LN    |
| 11     | HC   | 1977 | M      | 27        | a+c               | 208–217 | 15906          | EN    |
| 12     | HC   | 1979 | O      | 27        | d                 | 145–150 | 16087          | LN    |
| 13     | HC   | 1978 | I      | 29        | d                 | 240–245 | 16090          | EN    |
| 14     | HC   | 1978 | Q      | 27        | a+d               | 165     | 15899          | LN    |
| 15     | HC   | 1979 | M      | 23        | b                 | 175–180 | 15891+15892    | LN    |
| 16     | HC   | 1977 | M      | 24        | d                 | 173–178 | 15895          | LN    |
| 17     | HC   | 1975 | L      | 25+26     | c+a               | 188–195 | 15893          | LN    |
| 18     | HC   |      | I      | 30        | b                 | 240     | 16074          |       |
| 19     | HC   | 1979 | O      | 30        | d                 | 145–150 | 15913          | LN    |
| 20     | HC   | 1975 | K      | 26        | d                 | 193–202 | 15887          | LN    |
| 21     | HC   | 1975 | M      | 28        | b                 | 154–158 | 779            |       |
| 22     | HTC  | 2001 | M      | 13        | a                 | 318–325 | 1 3014         | LN    |
| 24     | HTC  | 2001 | J      | 14        | d                 | 310–315 | 2 3025         | LN    |
| 25     | HTC  | 2001 | L      | 14        | d                 | 334     | 1 3021         | LN    |
| 26     | HTC  | 2001 | M      | 13        | b                 | 335–340 | 3022           | LN    |
| 27     | HTC  | 2006 | M      | 13        | c                 | 365–370 | 1              | LN    |
| 28     | HTC  | 2001 | J      | 14        | d                 | 310–315 | 3026           | LN    |
| 29     | HTC  | 2005 | M      | 14        | a                 | 357–361 | 1 5316         | LN    |
| 30     | HTC  | 2001 | L      | 14        | b                 | 332     | 1 3018         | LN    |
| 31     | HTC  | 2005 | J      | 14+15     | c+d, b            |         | 2 4558         | LN    |
| 32     | HTC  | 2005 | M      | 14        | d                 | 307–328 | 1              | LN    |
| 33     | HC   | 1998 | O      | 24        | c                 | 222     | 8              | EN    |
| 34     | HC   | 1999 | O      | 32        | a                 | 195–200 | 3605           | EN    |
| 35     | HC   | 1998 | N      | 24        | b                 | 222–225 | 2519           | EN    |
| 36     | HC   | 1994 | N      | 24        | d                 | 215     | 8 107          | EN    |
| 37     | HC   | 1994 | P      | 32        | a                 | 176     | 2              | EN    |
| 38     | HC   | 1977 | M      | 28        | a                 | 198–203 |                | EN    |
| 39     | HTC  | 2001 | M      | 14        | c                 | 335–340 | 3039           | LN    |
| 40     | HTC  | 2008 | K      | 14        | a                 | 373     | 2 5784         | LN    |
| 41     | HTC  | 2006 | M      | 14        | a                 | 360–365 | 1 5302         | LN    |
| 42     | HTC  | 2000 | K      | 12        | d                 | 320–325 | 1674           | LN    |
| 43     | HTC  | 2008 | J      | 14        | b                 | 355     | 2 5519         | LN    |
| 44     | HTC  | 2001 | K      | 14        | c                 | 315–320 | 3040           | LN    |
| 45     | HTC  | 2005 | K      | 14        | a                 | 345     | 2 4365         | LN    |
